# Supplementary material
Source: HighWire-hosted journal article supplement (https://thorax.bmj.com/content/thoraxjnl-2019-213608)
Supplement: inline-supplementary-material-1 [file inline-supplementary-material-1.pdf]

| Authors                           | Year | Country   | n<br>(COPD/Controls)                          | % female        | Mean age (SD)<br>COPD/Controls                                               | Adjustment for<br>confounders<br>made                                                                 | Mean %<br>predicted FEV <sup>1</sup><br>(SD) COPD                             | Balance outcomes |     |     |               |                          |
|-----------------------------------|------|-----------|-----------------------------------------------|-----------------|------------------------------------------------------------------------------|-------------------------------------------------------------------------------------------------------|-------------------------------------------------------------------------------|------------------|-----|-----|---------------|--------------------------|
|                                   |      |           |                                               |                 |                                                                              |                                                                                                       |                                                                               | TUG              | SLS | BBS | Posturography | Other                    |
| Butcher, Meshke<br>& Sheppard(33) | 2004 | Canada    | 30(15 with O <sub>2</sub> ,<br>15 without)/21 | 64.28%          | 72.1(2.203) No O <sub>2</sub> ,<br>69.0(2.20) O <sub>2</sub> /<br>68.1(1.86) | Age                                                                                                   | 29.87(3.73) O <sub>2</sub><br>Group<br>45.7(29.87) No O <sub>2</sub><br>group | X                | X   |     | X             |                          |
| Eisner et al(34)                  | 2008 | USA       | 1202/302                                      | 57.64%          | 58.2(6.2)/ 58.5(6.2)                                                         | age, sex, race,<br>height,<br>educational<br>attainment,<br>household income<br>and smoking<br>status | 62(23)                                                                        |                  |     |     |               | Functional<br>reach test |
| Smith et al(35)                   | 2010 | Australia | 20/12                                         | 41.66%          | 64.6(7.2)/ 63.5(5.4)                                                         | None reported                                                                                         | 33.1(12.7)                                                                    |                  |     |     | X             |                          |
| Roig et al(36)                    | 2010 | Canada    | 21/21                                         | not<br>reported | 71.2(8.1)/ 67.4(8.6)                                                         | Age and weight                                                                                        | 47.2(12.9)                                                                    | X                |     |     |               |                          |
| Rocco et al(37)                   | 2011 | Brazil    | 22/16                                         | 26.32%          | 70(6.66)/ 68(6.56)                                                           | None reported                                                                                         | 39.88(8.69)                                                                   |                  |     |     | X             | Tinetti                  |

|                     |      |         |       |              |                       |                                                                      |            |  |  |   |   |         |
|---------------------|------|---------|-------|--------------|-----------------------|----------------------------------------------------------------------|------------|--|--|---|---|---------|
| Roig et al(38)      | 2011 | Canada  | 20/20 | not reported | 72.3(7.6)/ 68.2(8.1)  | Sex, age and BMI matched controls                                    | 46.7(13)   |  |  |   | X |         |
| Ozalevli et al(16)  | 2011 | Turkey  | 36/20 | 32.14%       | 70.3(3.01)/ 68.5(7.3) | None reported                                                        | 43.5(6.07) |  |  | X |   |         |
| Beauchamp et al(11) | 2012 | Canada  | 37/20 | 44.85%       | 71(7)/ 67(90)         | Age, knee flexor muscle strength and self-reported physical activity | 39.4(16.3) |  |  |   | X | BESTest |
| Janssens et al(8)   | 2013 | Belgium | 20/20 | Not stated   | 64(7)/ 64(6)          | None reported                                                        | 50(18)     |  |  |   | X |         |
| Janssens et al(13)  | 2014 | Belgium | 18/18 | not stated   | 65(7)/ 64(7)          | None reported                                                        | 51(19)     |  |  |   | X |         |

|                             |      |           |                              |                     |                                             |               |                              |   |   |     |   |                       |
|-----------------------------|------|-----------|------------------------------|---------------------|---------------------------------------------|---------------|------------------------------|---|---|-----|---|-----------------------|
| Mkacher et al(39)           | 2014 | Tunisia   | 16/18                        | 0%                  | 56.22(4.12)/<br>58.06(2.91)                 | None reported | 49.75(2.56)                  | X | X | X   |   | Tinetti               |
| Pedrozo & Silveira(40)      | 2015 | Brazil    | 29/24                        | 45.79%              | 64.72(7.67)/<br>63.58(8.17)                 | None reported | 49.15(10.90)                 |   |   |     | X |                       |
| Yumrutepe et al(14)         | 2015 | Turkey    | 90/57                        | 6.80%               | 60.2(7.8)/ 58.9(6.4)                        | None reported | 62.5(20.6)                   | X |   |     |   | Functional reach test |
| Crisan et al(41)            | 2015 | Romania   | 29 COPD, 17 AECOPD/17        | gender not reported | 62.2(5.0) COPD, 63.1(4.6) AECOPD/ 64.4(4.0) | None reported | 29(7)COPD group 28(7) AECOPD | X | X | X   |   |                       |
| Oliveira et al(42)          | 2015 | Australia | 40/25                        | 52%                 | 71(8)/ 69(8)                                | None reported | 41.5(16.2)                   |   |   | X** |   |                       |
| Tudorache et al(12)         | 2015 | Romania   | 41 (21 Stable, 19 AECOPD)/20 | not reported        | 63(5) COPD, 63(3) AECOPD/ 63(4)*            | None reported | 27.5(7) COPD 20(10) AECOPD*  | X | X | X   |   |                       |
| Smith, Chang and Hodges(17) | 2016 | Australia | 15/15                        | 40%                 | 66(8)/ 65(6)                                | None reported | 35.1(12.5)                   |   |   |     | X |                       |

|                     |      |           |                                            |              |                                                           |                                                                                                                                                     |                                       |   |   |   |   |                       |
|---------------------|------|-----------|--------------------------------------------|--------------|-----------------------------------------------------------|-----------------------------------------------------------------------------------------------------------------------------------------------------|---------------------------------------|---|---|---|---|-----------------------|
| Voica et al(43)     | 2016 | Romania   | 27 (13 Emphysematous and 14 Bronchitic)/17 | not reported | 64.1(2.6) Emphysematous, 63.9(1.9) Bronchitic/ 61.3(4.0)* | None reported                                                                                                                                       | 31(2) Emphysematous 30(4) Bronchitic* | X | X | X |   |                       |
| Iwakura et al(9)    | 2016 | Japan     | 22/13                                      | 0%           | 71.6(6.9)/ 71.5(5.6)                                      | Age, pulmonary function, nutritional status, dyspnoea, quadriceps muscle strength, functional exercise capacity, and health-related quality of life | 52.8(20.6)                            |   | X |   |   | Standing balance test |
| de Castro et al(44) | 2016 | Brazil    | 47/25                                      | 41.66%       | 65(5)/ 66(8)                                              | None reported                                                                                                                                       | 45(15)                                | X | X |   | X |                       |
| Porto et al(45)     | 2017 | Brazil    | 93/39                                      | 45.07%       | 67.3(10.8)/ 65.1(9.7)                                     | None reported                                                                                                                                       | 50.4(19)                              |   |   | X | X |                       |
| Oliveira et al(15)  | 2017 | Australia | 26/25                                      | 50.64%       | 70(9) COPD, 72(7) AECOPD/ 70(8)                           | Quadriceps strength adjusted for age, sex, and BMI                                                                                                  | 44(18) COPD 48(11) AECOPD             |   |   | X | X |                       |
| Morlino et al(46)   | 2017 | Italy     | 40/28                                      | 35.35%       | 70.7(7.1)/ 69.5(6.7)                                      | None reported                                                                                                                                       | 50.2(21.1)                            | X |   |   | X | Mini BESTest          |

Participant characteristics for all participants in the review; mean age was 65.9 years, 38% of participants were female; COPD groups mean FEV<sup>1</sup> was 42.4%, age was 66.5, 35.2% were female; control groups mean FEV<sup>1</sup> was 101.3%, age was 65.2, 38.4% were female.

Study sample sizes range: n=30-1504. Total sample size in review: n=2751 patients with COPD.

\*median (IQR), \*\*confirmed with authors, some participants data used in both papers for this outcome

TUG = timed up and go, SLS = single leg stance, BBS = berg balance scale
