# Supplementary material
Source: HighWire-hosted journal article supplement (https://thorax.bmj.com/content/thoraxjnl-2019-213608)
Supplement: inline-supplementary-material-2 [file inline-supplementary-material-2.pdf]

|                                                                                    | Butcher Meshke & Sheppard 2004 | Eisner et al 2008 | Smith et al 2010 | Roig et al 2010 | Rocco et al 2011 | Roig et al 2011 | Ozalevli et al 2011 | Beauchamp et al 2012 | Janssens et al 2013 | Janssens et al 2014 | Mkacher et al 2014 | Pedrozo & Silveira 2015 | Yumrutepe et al 2015 | Crisan et al 2015 | Oliveira et al 2015 | Tudorache et al 2015 | Smith, Chang & Hodges 2016 | Voica et al 2016 | Iwakura et al 2016 | De Castro et al 2016 | Porto et al 2017 | Oliveira et al 2017 | Morlino et al 2017 |
|------------------------------------------------------------------------------------|--------------------------------|-------------------|------------------|-----------------|------------------|-----------------|---------------------|----------------------|---------------------|---------------------|--------------------|-------------------------|----------------------|-------------------|---------------------|----------------------|----------------------------|------------------|--------------------|----------------------|------------------|---------------------|--------------------|
| 1. Hypothesis /aim/ objectives clearly described?                                  | yes                            | yes               | yes              | yes             | yes              | yes             | yes                 | yes                  | yes                 | yes                 | yes                | yes                     | yes                  | yes               | yes                 | yes                  | yes                        | yes              | yes                | yes                  | yes              | yes                 | yes                |
| 2. Main outcomes clearly described in introduction/ methods?                       | yes                            | yes               | yes              | yes             | yes              | yes             | yes                 | yes                  | yes                 | yes                 | yes                | yes                     | yes                  | yes               | yes                 | yes                  | yes                        | yes              | yes                | yes                  | yes              | yes                 | yes                |
| 3. Characteristics of patients included clearly described?                         | no                             | yes               | yes              | yes             | yes              | yes             | yes                 | yes                  | yes                 | yes                 | yes                | yes                     | yes                  | yes               | yes                 | yes                  | yes                        | yes              | yes                | yes                  | yes              | yes                 | yes                |
| 4. Interventions of interest clearly described?                                    | n/a                            | n/a               | n/a              | n/a             | n/a              | n/a             | n/a                 | n/a                  | n/a                 | n/a                 | n/a                | n/a                     | n/a                  | n/a               | n/a                 | n/a                  | n/a                        | n/a              | n/a                | n/a                  | n/a              | n/a                 | n/a                |
| 5. Distributions of confounders in each group to be compared clearly described?    | yes                            | yes               | yes              | UD<br>NR        | yes              | UD<br>NR        | yes                 | yes                  | yes                 | yes                 | yes                | UD<br>NR                | yes                  | UD<br>NR          | yes                 | yes                  | yes                        | UD<br>NR         | yes                | UD<br>NR             | yes              | yes                 | yes                |
| 6. Main findings clearly described?                                                | yes                            | yes               | yes              | yes             | yes              | yes             | yes                 | yes                  | yes                 | yes                 | yes                | yes                     | yes                  | yes               | yes                 | yes                  | yes                        | yes              | yes                | yes                  | yes              | yes                 | yes                |
| 7. Estimates of the random variability in the data for the main outcomes provided? | yes                            | yes               | yes              | yes             | yes              | yes             | yes                 | yes                  | yes                 | yes                 | yes                | yes                     | yes                  | yes               | yes                 | yes                  | yes                        | yes              | yes                | yes                  | yes              | yes                 | yes                |

|                                                                                                                  |          |     |          |     |          |     |     |          |          |          |          |     |          |          |          |          |          |          |     |          |          |     |          |
|------------------------------------------------------------------------------------------------------------------|----------|-----|----------|-----|----------|-----|-----|----------|----------|----------|----------|-----|----------|----------|----------|----------|----------|----------|-----|----------|----------|-----|----------|
| 8. All adverse events potentially from the intervention reported?                                                | n/a      | n/a | n/a      | n/a | n/a      | n/a | n/a | n/a      | n/a      | n/a      | n/a      | n/a | n/a      | n/a      | n/a      | n/a      | n/a      | n/a      | n/a | n/a      | n/a      | n/a | n/a      |
| 9. Characteristics of patients lost to follow-up described?                                                      | n/a      | n/a | n/a      | n/a | n/a      | n/a | n/a | n/a      | n/a      | n/a      | n/a      | n/a | n/a      | n/a      | n/a      | n/a      | n/a      | n/a      | n/a | n/a      | n/a      | n/a | n/a      |
| 10. Actual probability values for the main outcomes reported?                                                    | yes      | yes | yes      | yes | no       | yes | yes | yes      | yes      | yes      | no       | yes | yes      | yes      | yes      | yes      | yes      | yes      | yes | yes      | yes      | yes | yes      |
| Reporting subscore (/11) (/8)                                                                                    | 7        | 7   | 8        | 7   | 6        | 7   | 8   | 8        | 8        | 8        | 7        | 7   | 8        | 7        | 8        | 8        | 8        | 8        | 8   | 7        | 7        | 7   | 7        |
| 11. Subjects asked to participate representative of the entire population?                                       | UD<br>NR | yes | UD<br>NR | yes | UD<br>NR | yes | no  | UD<br>NR | UD<br>NR | UD<br>NR | UD<br>NR | yes | UD<br>NR | UD<br>NR | yes      | UD<br>NR | UD<br>NR | UD<br>NR | no  | UD<br>NR | UD<br>NR | yes | UD<br>NR |
| 12. Subjects who accepted to participate representative of the entire population?                                | UD<br>NR | no  | UD<br>NR | yes | UD<br>NR | no  | no  | UD<br>NR | UD<br>NR | UD<br>NR | UD<br>NR | no  | UD<br>NR | UD<br>NR | UD<br>NR | UD<br>NR | UD<br>NR | UD<br>NR | no  | UD<br>NR | UD<br>NR | yes | UD<br>NR |
| 13. Staff, places, facilities where patients were treated representative of the treatment most patients receive? | yes      | yes | UD<br>NR | yes | yes      | no  | yes | UD<br>NR | UD<br>NR | UD<br>NR | UD<br>NR | yes | yes      | UD<br>NR | yes      | no       | UD<br>NR | no       | yes | UD<br>NR | yes      | yes | UD<br>NR |
| External validity subscore (/3) (/3)                                                                             | 1        | 3   | 0        | 3   | 1        | 3   | 3   | 0        | 0        | 0        | 0        | 2   | 1        | 0        | 2        | 0        | 0        | 1        | 2   | 0        | 1        | 3   | 0        |
| 14. Attempt made to blind study subjects?                                                                        | n/a      | n/a | n/a      | n/a | n/a      | n/a | n/a | n/a      | n/a      | n/a      | n/a      | n/a | n/a      | n/a      | n/a      | n/a      | n/a      | n/a      | n/a | n/a      | n/a      | n/a | n/a      |
| 15. Attempt made to blind those measuring the main outcomes?                                                     | n/a      | n/a | n/a      | n/a | n/a      | n/a | n/a | n/a      | n/a      | n/a      | n/a      | n/a | n/a      | n/a      | n/a      | n/a      | n/a      | n/a      | n/a | n/a      | n/a      | n/a | n/a      |

|                                                                                                             |     |     |       |     |       |     |       |       |       |       |       |       |       |       |     |       |       |       |       |       |       |     |       |
|-------------------------------------------------------------------------------------------------------------|-----|-----|-------|-----|-------|-----|-------|-------|-------|-------|-------|-------|-------|-------|-----|-------|-------|-------|-------|-------|-------|-----|-------|
| 16. Any results based on "data dredging" made clear?                                                        | yes | yes | yes   | yes | yes   | yes | yes   | yes   | yes   | yes   | no    | yes   | yes   | yes   | yes | yes   | yes   | yes   | yes   | yes   | yes   | yes | yes   |
| 17. Analyses adjust for different lengths of follow-up or follow-up length the same for cases and controls? | n/a | n/a | n/a   | n/a | n/a   | n/a | n/a   | n/a   | n/a   | n/a   | n/a   | n/a   | n/a   | n/a   | n/a | n/a   | n/a   | n/a   | n/a   | n/a   | n/a   | n/a | n/a   |
| 18. Statistical tests for main outcomes appropriate?                                                        | yes | yes | yes   | yes | yes   | yes | yes   | yes   | yes   | yes   | yes   | yes   | yes   | yes   | yes | yes   | yes   | yes   | yes   | yes   | yes   | yes | yes   |
| 19. Compliance with intervention reliable?                                                                  | n/a | n/a | n/a   | n/a | n/a   | n/a | n/a   | n/a   | n/a   | n/a   | n/a   | n/a   | n/a   | n/a   | n/a | n/a   | n/a   | n/a   | n/a   | n/a   | n/a   | n/a | n/a   |
| 20. Main outcome measures used valid and reliable?                                                          | yes | yes | yes   | yes | yes   | yes | yes   | yes   | yes   | yes   | yes   | yes   | yes   | yes   | yes | yes   | yes   | yes   | yes   | yes   | yes   | yes | yes   |
| Internal validity – bias (/7) (/3)                                                                          | 3   | 3   | 3     | 3   | 3     | 3   | 3     | 3     | 3     | 2     | 3     | 3     | 3     | 3     | 3   | 2     | 3     | 3     | 3     | 3     | 3     | 3   | 3     |
| 21. Subjects from both groups recruited from the same population?                                           | yes | yes | UD NR | yes | UD NR | yes | UD NR | no    | UD NR | no    | UD NR | UD NR | UD NR | no    | yes | UD NR | UD NR | UD NR | yes   | no    | UD NR | yes | UD NR |
| 22. Subjects from both groups recruited over the same time period?                                          | no  | no  | UD NR | yes | UD NR | yes | UD NR | yes   | yes   | UD NR | yes | UD NR | no  | UD NR |
| 23. Study subjects randomised to intervention group?                                                        | n/a | n/a | n/a   | n/a | n/a   | n/a | n/a   | n/a   | n/a   | n/a   | n/a   | n/a   | n/a   | n/a   | n/a | n/a   | n/a   | n/a   | n/a   | n/a   | n/a   | n/a | n/a   |
| 24. Randomisation concealed from patients and staff until recruitment complete and irrevocable?             | n/a | n/a | n/a   | n/a | n/a   | n/a | n/a   | n/a   | n/a   | n/a   | n/a   | n/a   | n/a   | n/a   | n/a | n/a   | n/a   | n/a   | n/a   | n/a   | n/a   | n/a | n/a   |

|                                                                                       |     |     |     |     |     |     |     |     |     |     |     |     |     |     |     |     |     |     |     |     |     |     |     |
|---------------------------------------------------------------------------------------|-----|-----|-----|-----|-----|-----|-----|-----|-----|-----|-----|-----|-----|-----|-----|-----|-----|-----|-----|-----|-----|-----|-----|
| 25. Adequate adjustment for confounding in the analyses for main findings?            | yes | yes | no  | yes | no  | yes | no  | yes | yes | yes | yes | no  | no  | no  | yes | no  | no  | yes | yes | no  | yes | yes | no  |
| 26. Losses of patient to follow-up taken into account?                                | n/a |
| Internal validity – confounding (selection bias) (/6) (/3)                            | 1   | 3   | 1   | 3   | 1   | 1   | 3   | 1   | 1   | 1   | 1   | 1   | 2   | 1   | 3   | 0   | 0   | 1   | 2   | 1   | 1   | 3   | 1   |
| Study adequately powered?                                                             | no  | yes | no  | yes | yes | no  | no  | yes | no  | no  | yes | yes | no  | no  | yes | no  | no  | no  | yes | yes | no  | yes | no  |
| Power (/1)                                                                            | 0   | 1   | 0   | 0   | 1   | 0   | 0   | 1   | 0   | 0   | 0   | 0   | 0   | 2   | 1   | 0   | 0   | 0   | 1   | 1   | 0   | 1   | 0   |
| TOTAL SCORE (/28) (/18)                                                               | 11  | 14  | 11  | 13  | 11  | 13  | 14  | 12  | 11  | 10  | 10  | 12  | 12  | 12  | 14  | 10  | 11  | 12  | 14  | 11  | 11  | 14  | 10  |
| UD = Unable to determine; NR=not reported; PR=partially reported; n/a= non-applicable |     |     |     |     |     |     |     |     |     |     |     |     |     |     |     |     |     |     |     |     |     |     |     |
